# Supplementary figures and images for: Bacterial Glycocalyx Integrity Impacts Tolerance of Myxococcus xanthus to Antibiotics and Oxidative-Stress Agents
Source: MDPI journal article supplement (doi:10.3390/biom12040571), 2022-04-12

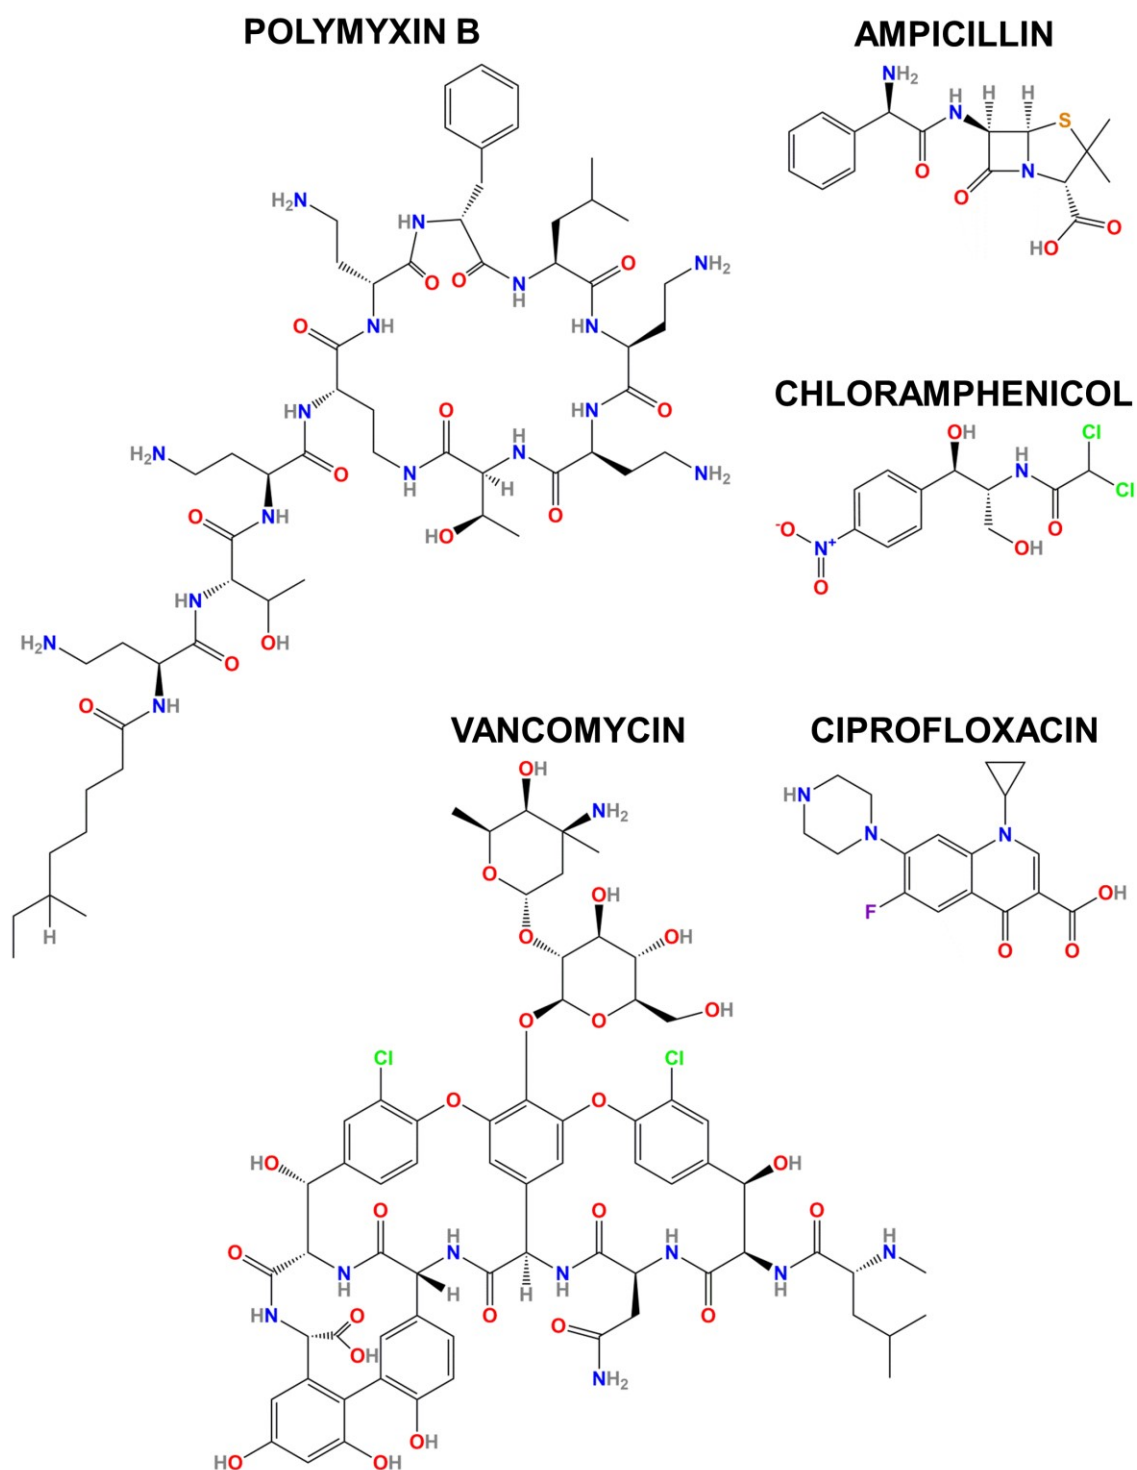

**Figure S1.** Chemical structures of the antibiotics used in this study.

Supplement: s1 [file s1]
